# Supplementary material
Source: Springer Nature journal article supplement (https://www.springermedizin.de/resource/supplementary/12875_2011_588_MOESM1_ESM.pdf/9434982)

**% of consultations**

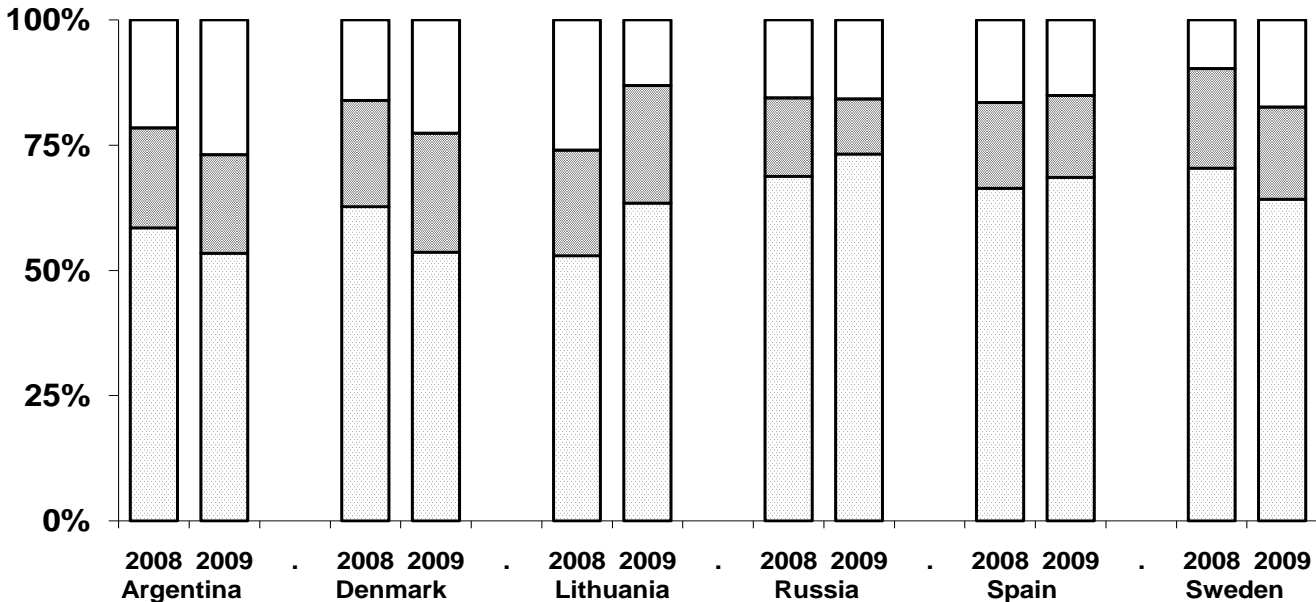

Upper RTI

Lower RTI

Other RTI

Supplement: MOESM1 [file 9434982]
